# Supplementary material for: Effect of substituents and anions on the phase behavior of Ru(ii) sandwich complexes: exploring the boundaries between ionic liquids and ionic plastic crystals
Source: Royal Society of Chemistry journal article supplement (doi:10.1039/c6cp08308k), 2017-01-01
Supplement: c6cp08308k1.pdf [file c6cp08308k1.pdf]

## Supporting Information

Effects of Substituents and Anions on the Phase Behavior of Ru(II) Sandwich Complexes: Exploring the Boundaries between Ionic Liquids and Ionic Plastic Crystals

Takumi Tominaga, Takahiro Ueda, Tomoyuki Mochida\*

*Department of Chemistry, Graduate School of Science, Kobe University, Kobe, Hyogo 657-8501, Japan. E-mail: tmochida@platinum.kobe-u.ac.jp*

**Table S1** Volumes and radii of anions estimated by DFT calculations.

| anion                           | $V$ (Å <sup>3</sup> ) | $r_{\text{anion}}$ (Å) |
|---------------------------------|-----------------------|------------------------|
| PF <sub>6</sub> <sup>-</sup>    | 74.9                  | 2.61                   |
| C(CN) <sub>3</sub> <sup>-</sup> | 90.8                  | 2.79                   |
| FSA <sup>-</sup>                | 98.7                  | 2.87                   |
| B(CN) <sub>4</sub> <sup>-</sup> | 117.2                 | 3.04                   |
| Tf <sub>2</sub> N <sup>-</sup>  | 157.5                 | 3.35                   |

**Table S2** Volumes and radii of cations estimated by DFT calculations.

| cation            | $V$ (Å <sup>3</sup> ) | $r_{\text{cation}}$ (Å) |
|-------------------|-----------------------|-------------------------|
| [C0] <sup>+</sup> | 186.6                 | 3.54                    |
| [C1] <sup>+</sup> | 204.9                 | 3.66                    |
| [C2] <sup>+</sup> | 223.1                 | 3.76                    |
| [C4] <sup>+</sup> | 260.0                 | 3.96                    |

**Table S3** Phase transition data of the salts investigated herein.<sup>a</sup>

|                                     | Phase transition | $T_c$ (°C) | $\Delta H$ (kJ mol <sup>-1</sup> ) | $\Delta S$ (J mol <sup>-1</sup> K <sup>-1</sup> ) |
|-------------------------------------|------------------|------------|------------------------------------|---------------------------------------------------|
| [C0][PF <sub>6</sub> ] <sup>b</sup> | I → II           | 59.3       | 4.16                               | 12.5                                              |
| [C0][FSA]                           | I → II           | 159.8      | 9.7                                | 22.2                                              |
|                                     | II → III*        | 182.7      | 6.5                                | 14.2                                              |
| [C0][B(CN) <sub>4</sub> ]           | I → II           | 55.8       | 7.6                                | 22.9                                              |
|                                     | II → III*        | 67.1       | 8.8                                | 25.6                                              |
| [C0][C(CN) <sub>3</sub> ]           | I → II           | 48.9       | 10.2                               | 31.6                                              |
|                                     | II → liq.        | 90.2       | 10.1                               | 27.5                                              |
| [C1][PF <sub>6</sub> ]              | I → II*          | 14.8       | 8.6                                | 29.0                                              |
| [C1][FSA]                           | I → II           | -8.6       | 7.7                                | 28.6                                              |
|                                     | II → III*        | 45.7       | 2.5                                | 7.6                                               |
| [C1][B(CN) <sub>4</sub> ]           | I → II*          | 14.2       | 26.5                               | 91.2                                              |
| [C1][C(CN) <sub>3</sub> ]           | liq. → I         | -58.6      | 10.0                               | 45.4                                              |
|                                     | I → II           | -29.7      | 0.9                                | 3.6                                               |
|                                     | II → liq.        | -1.3       | 20.4 <sup>d</sup>                  | 73.7 <sup>d</sup>                                 |
| [C2][PF <sub>6</sub> ]              | I → II*          | 88.3       | 10.3                               | 28.1                                              |
|                                     | II* → liq.       | 161.3      | 5.8                                | 13.2                                              |
| [C2][FSA]                           | I → liq.         | 16.9       | 18.9                               | 64.6                                              |
| [C2][B(CN) <sub>4</sub> ]           | I → II*          | 15.7       |                                    |                                                   |
|                                     | II* → liq.       | 22.6       | 15.2 <sup>e</sup>                  | 52.2 <sup>e</sup>                                 |
| [C4][PF <sub>6</sub> ] <sup>c</sup> | I → II           | 62.8       | 8.7                                | 26.3                                              |
|                                     | II → III         | 73.0       | 5.6                                | 16.6                                              |
|                                     | III → liq.       | 87.0       | 7.8                                | 22.8                                              |

<sup>a</sup>Asterisk symbols (\*) denote plastic phases. <sup>b</sup>Data from Ref 8. <sup>c</sup>Data from Ref 7.

<sup>d</sup>Including the contribution of a solid phase transition near the melting point that appeared as a shoulder. <sup>e</sup>Including the contribution of the solid phase transition from I to II\*.

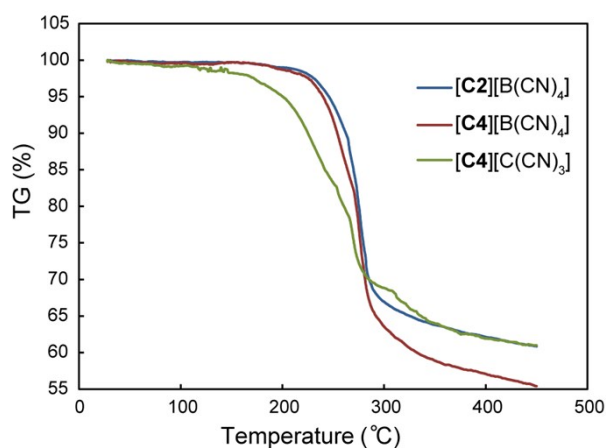

**Fig. S1** Thermogravimetric traces of (a) [C2][B(CN)<sub>4</sub>], (b) [C4][B(CN)<sub>4</sub>], and (c) [C4][C(CN)<sub>3</sub>] (10 K min<sup>-1</sup>).

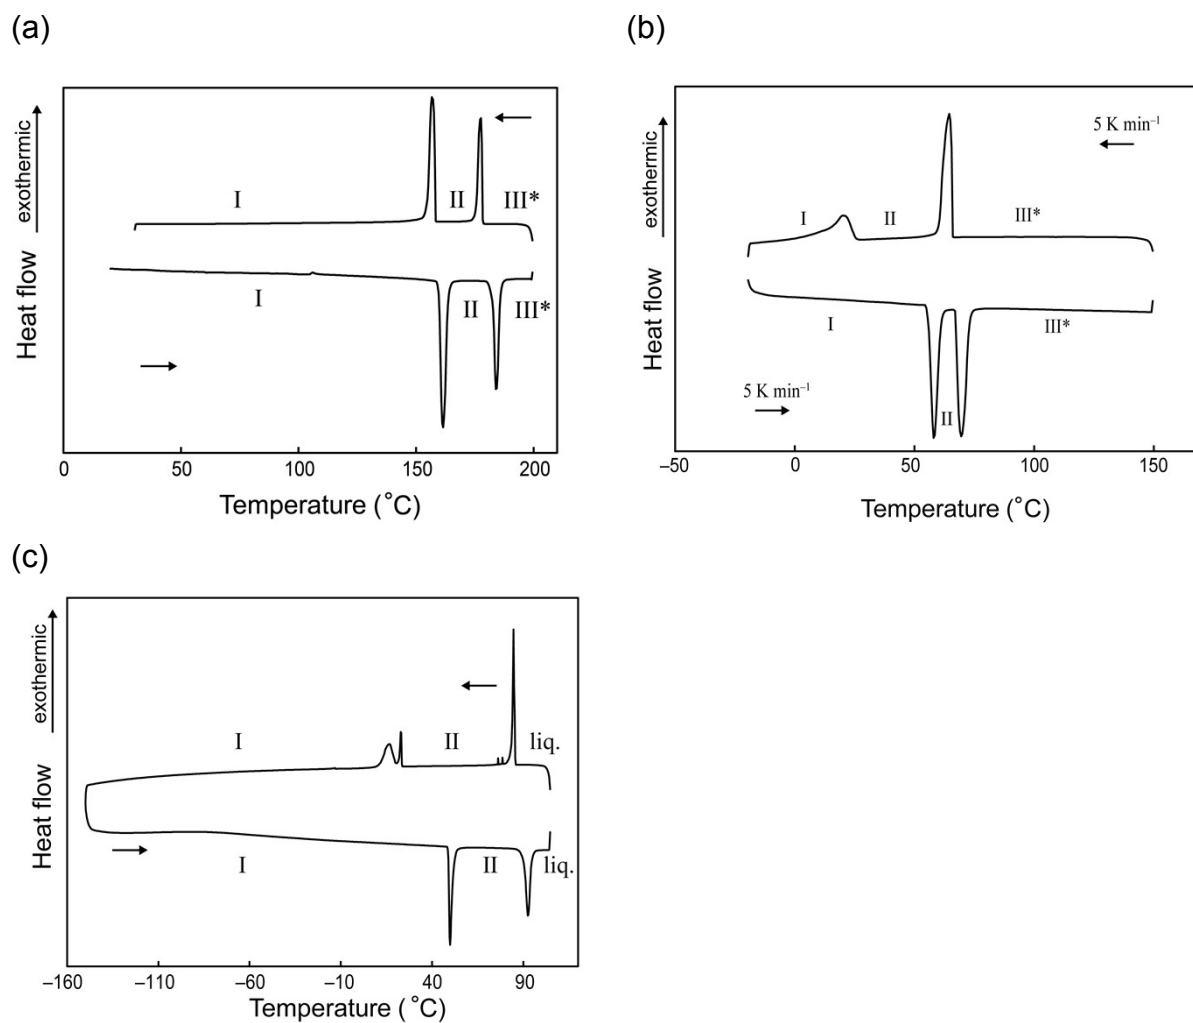

**Fig. S2** DSC traces of (a) [C0][FSA], (b) [C0][B(CN)<sub>4</sub>], and (c) [C0][C(CN)<sub>3</sub>] (*liq.*: liquid phase). Asterisk symbols (\*) denote plastic phases.

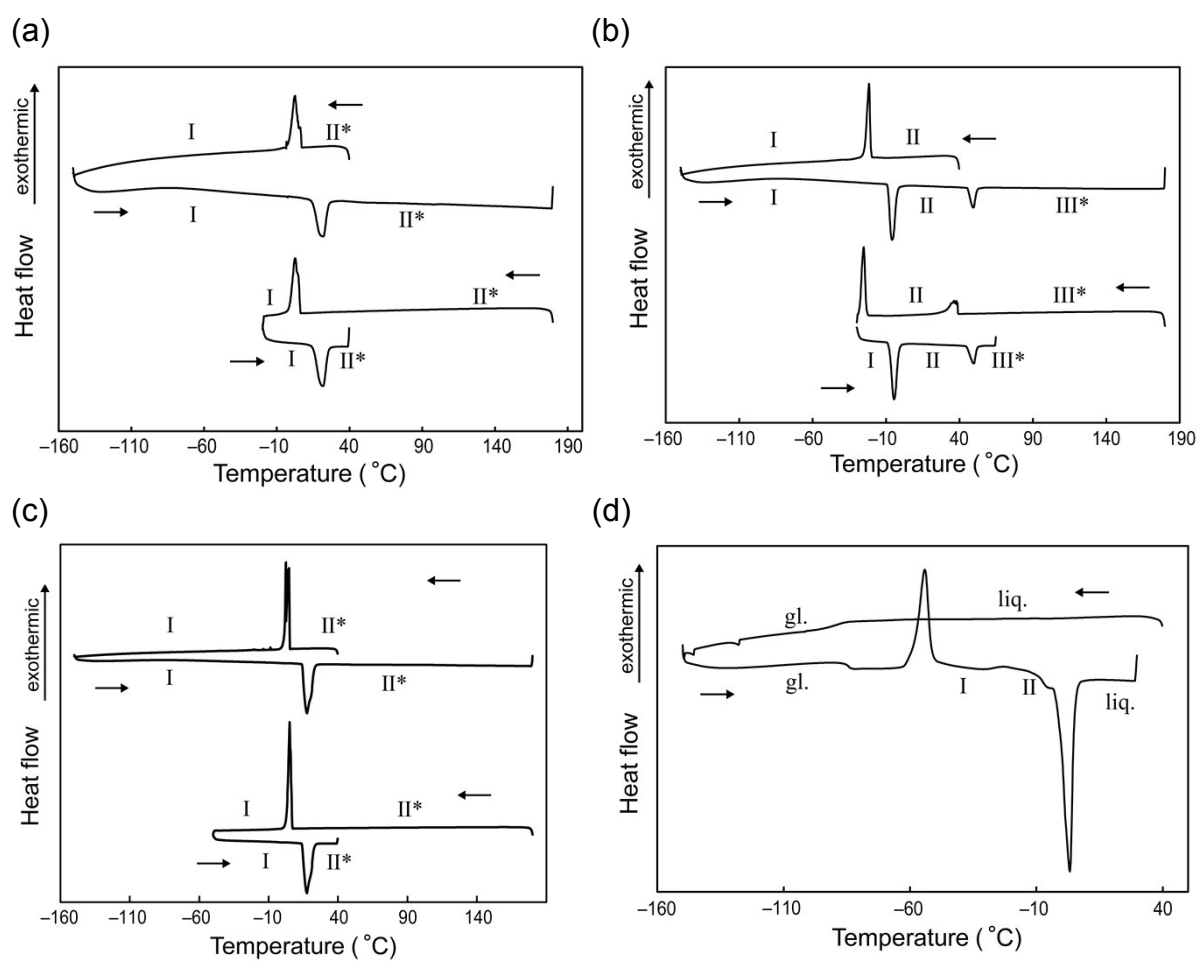

**Fig. S3** DSC traces of (a)  $[\mathbf{C1}][\text{PF}_6]$ , (b)  $[\mathbf{C1}][\text{FSA}]$ , (c)  $[\mathbf{C1}][\text{B}(\text{CN})_4]$ , and (d)  $[\mathbf{C1}][\text{C}(\text{CN})_3]$  (*gl.*: glassy phase, *liq.*: liquid phase). Asterisk symbols (\*) denote plastic phases.

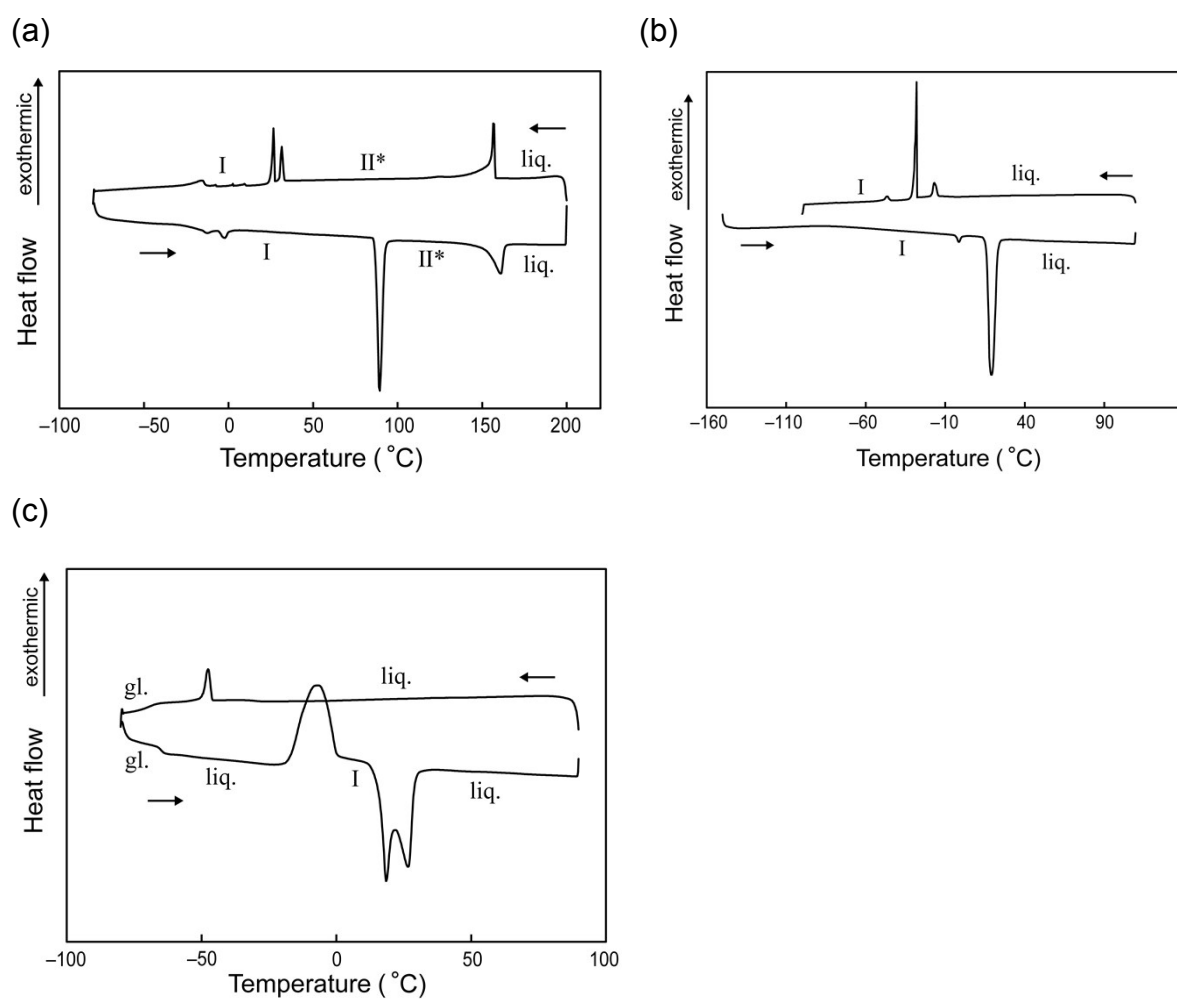

**Fig. S4** DSC traces of (a) [C2][PF<sub>6</sub>], (b) [C2][FSA], and (c) [C2][B(CN)<sub>4</sub>] (*gl.*: glassy phase, *liq.*: liquid phase).

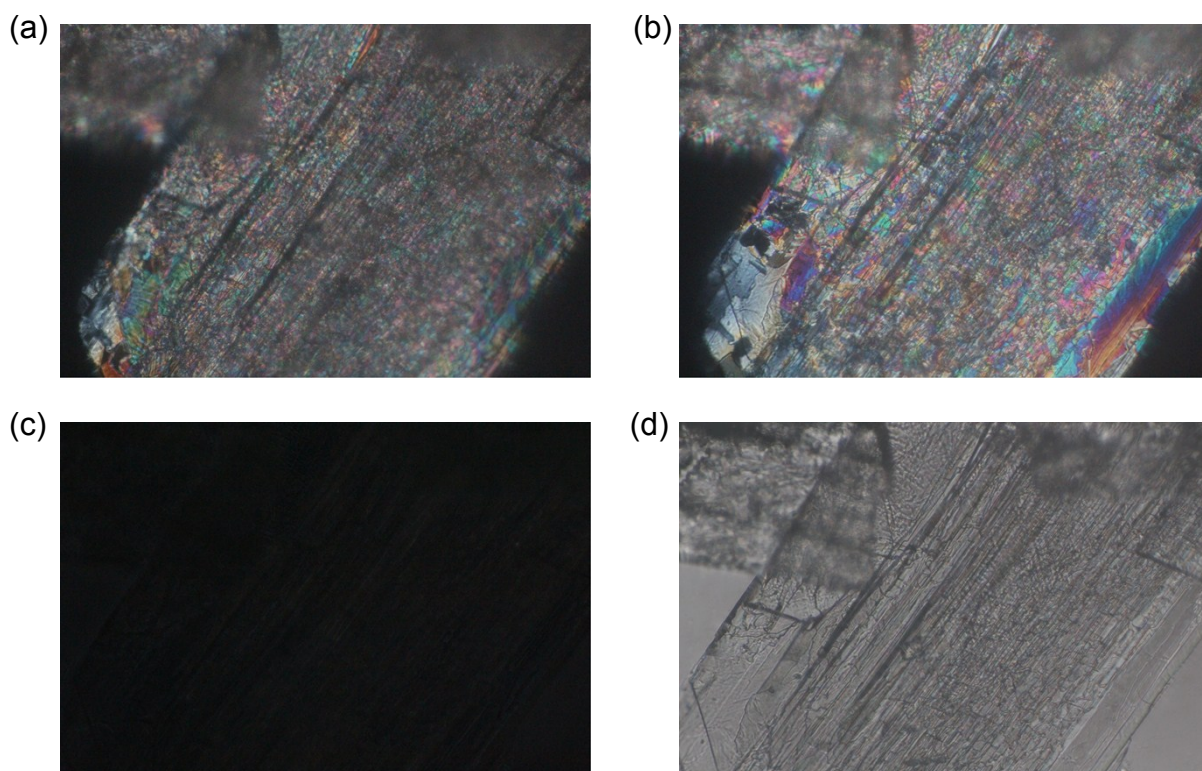

**Fig. S5** Polarizing microscope images of [C0][FSA] at (a) 25 °C, (b) 170 °C, (c) 200 °C (crossed nicols), and (d) 200 °C (open nicol).

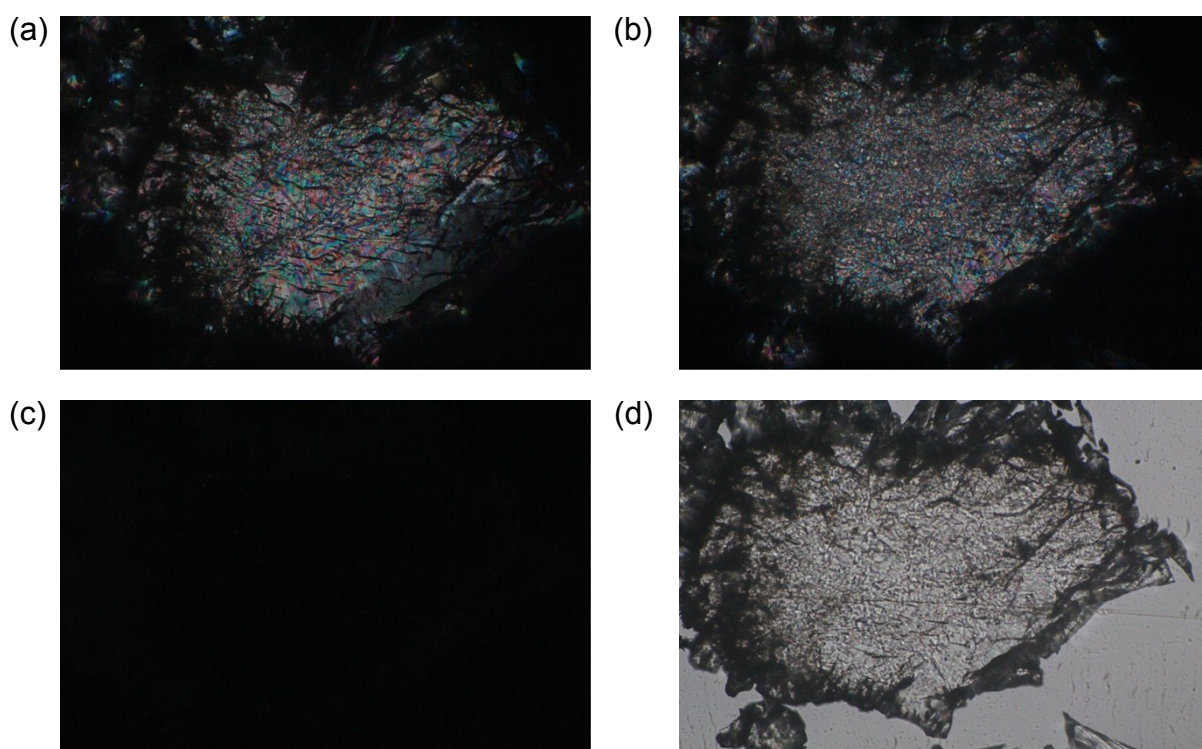

**Fig. S6** Polarizing microscope images of [C0][B(CN)<sub>4</sub>] at (a) 25 °C, (b) 60 °C, (c) 80 °C (crossed nicols), and (d) 80 °C (open nicol).

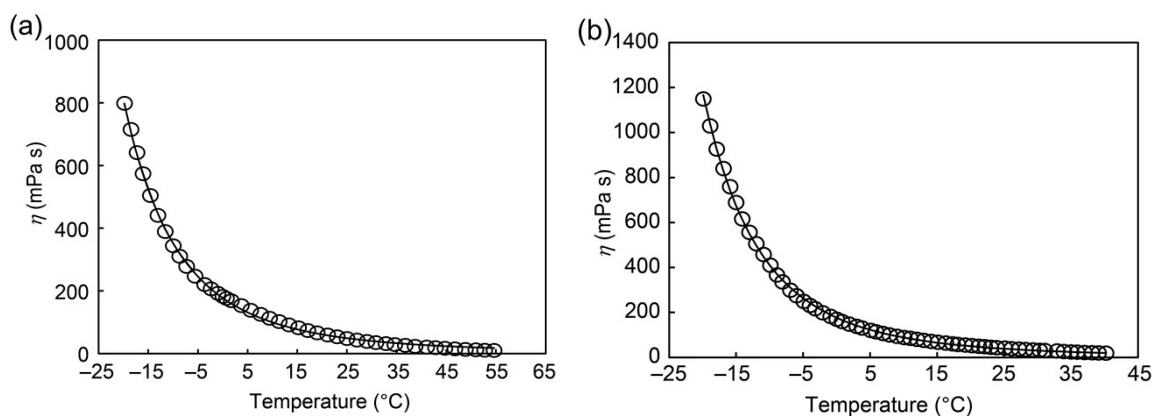

**Fig. S7** Temperature dependence of the viscosities of (a)  $[\text{C2}][\text{B}(\text{CN})_4]$  and (b)  $[\text{C4}][\text{B}(\text{CN})_4]$ . Solid lines are fitted from the VFT equation.

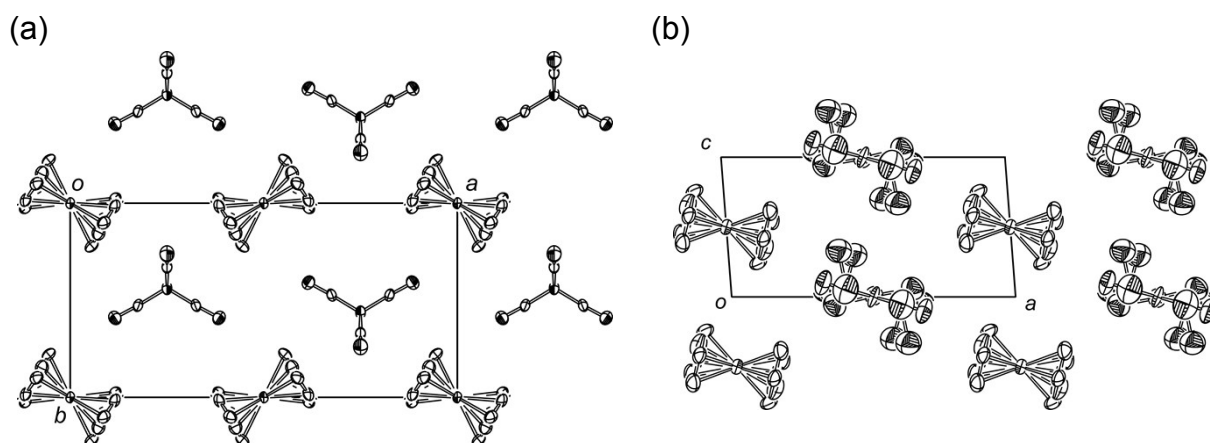

**Fig. S8** Packing diagrams of (a)  $[\text{C0}][\text{FSA}]$  (296 K) and (b)  $[\text{C0}][\text{B}(\text{CN})_4]$  (173 K). Hydrogen atoms have been omitted for clarity. Refinements were performed by tentatively assuming the space groups to be  $Ama2$  and  $C2$ , respectively (See text).

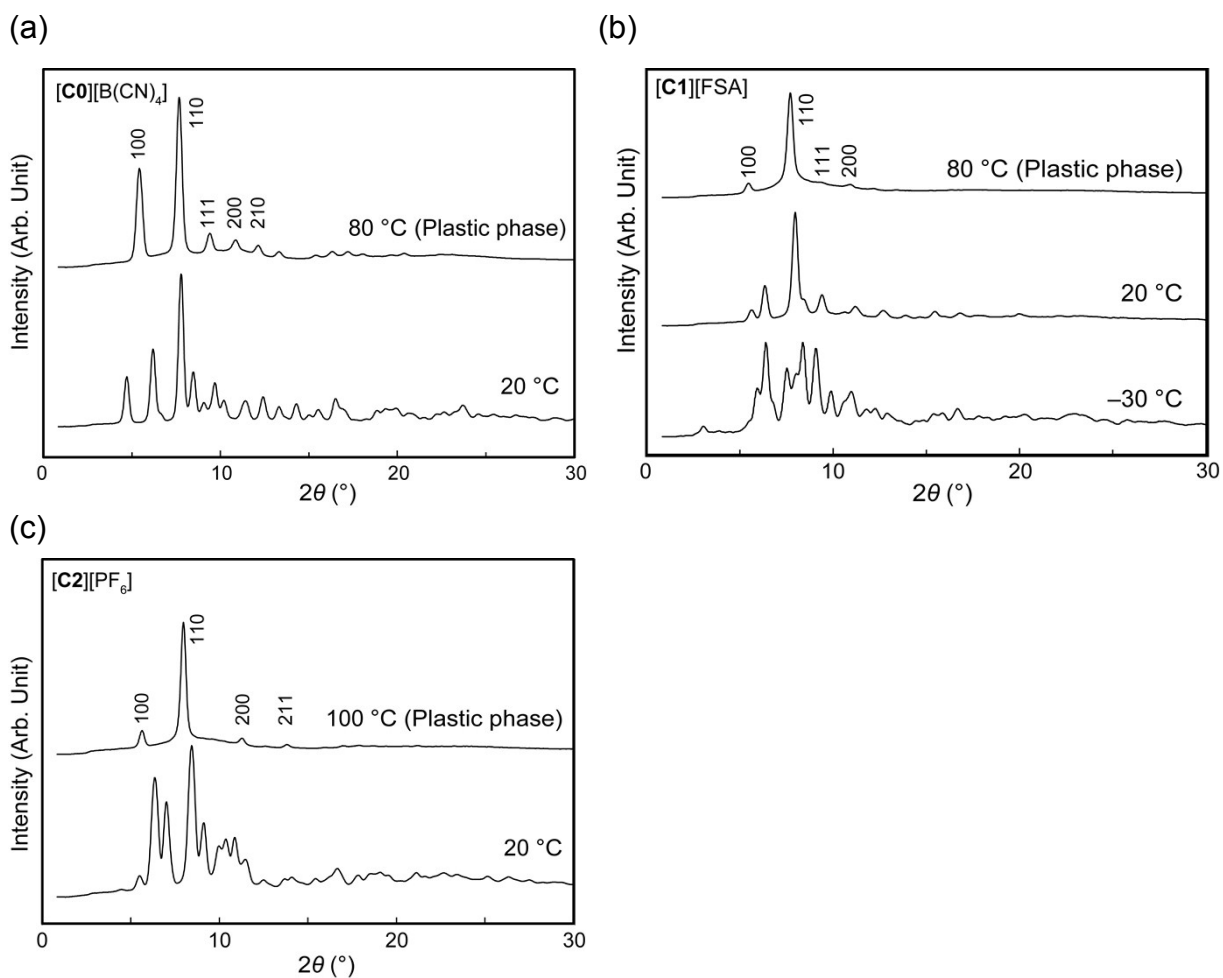

**Fig. S9** Powder XRD patterns of (a)  $[C0][B(CN)_4]$ , (b)  $[C1][FSA]$  and (c)  $[C2][PF_6]$  (MoK $\alpha$  radiation,  $\lambda = 0.71073 \text{ \AA}$ ).

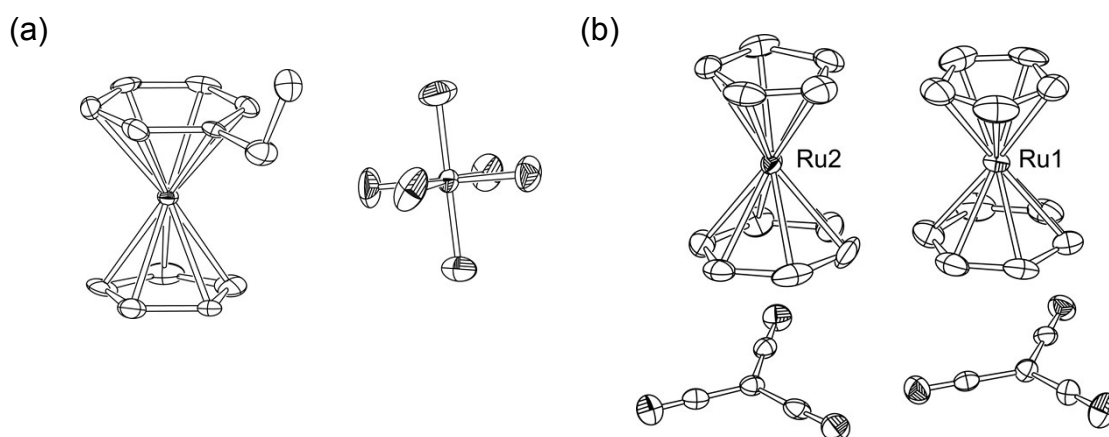

**Fig. S10** ORTEP drawings of the molecular structures of (a)  $[C2][PF_6]$  and (b)  $[C0][C(CN)_3]$ . Hydrogen atoms have been omitted for clarity.



**Table S4** Cell parameters of [C0][FSA] and [C0][B(CN)<sub>4</sub>]

|                                                  | [C0][FSA]                                                          | [C0][B(CN) <sub>4</sub> ]                          |
|--------------------------------------------------|--------------------------------------------------------------------|----------------------------------------------------|
| Empirical formula                                | C <sub>11</sub> H <sub>11</sub> F <sub>2</sub> NO <sub>4</sub> RuS | C <sub>15</sub> H <sub>11</sub> N <sub>4</sub> BRu |
| Formula weight                                   | 424.40                                                             | 359.16                                             |
| Crystal system                                   | Monoclinic                                                         | Orthorhombic                                       |
| <i>a</i> (Å)                                     | 12.856(6)                                                          | 17.530(10)                                         |
| <i>b</i> (Å)                                     | 8.925(4)                                                           | 8.791(5)                                           |
| <i>c</i> (Å)                                     | 6.333(3)                                                           | 9.499(6)                                           |
| $\alpha$ (°)                                     | 69.578(5)                                                          | 90                                                 |
| $\beta$ (°)                                      | 86.466(6)                                                          | 90                                                 |
| $\gamma$ (°)                                     | 86.334(5)                                                          | 90                                                 |
| <i>V</i> (Å <sup>3</sup> )                       | 724.5(6)                                                           | 1463.9(15)                                         |
| <i>Z</i>                                         | 2                                                                  | 4                                                  |
| <i>d</i> <sub>calcd.</sub> (mg m <sup>-3</sup> ) | 1.945                                                              | 1.630                                              |
| <i>T</i> (K)                                     | 296                                                                | 173                                                |
